# Supplementary material for: Reporting of Fairness Metrics in Clinical Risk Prediction Models: A Call for Change
Source: bioRxiv or medRxiv preprint supplement (doi:10.1101/2024.03.16.24304390), 2024-03-18
Supplement: Supplementary file [file media-1.pdf]

## Appendix

### S.1 Table of Selected CVD Papers for General Population

| Title                                                                                                                                       | Authors                                                        | Link/DOI                                                                                                  | Citations | Journal                                            | Year | Outcome assessed                                     | Type of model used                                         | Geographic region                | Racial demographics (self-reported unless otherwise noted)                                                                                                                                                      | Sensitive features considered as risk factors | Sensitive features considered for stratified analysis | Were model calibration and discrimination assessed for different sensitive features? | Criteria for model evaluation                                     | Do authors explicitly consider or report fairness metrics? |
|---------------------------------------------------------------------------------------------------------------------------------------------|----------------------------------------------------------------|-----------------------------------------------------------------------------------------------------------|-----------|----------------------------------------------------|------|------------------------------------------------------|------------------------------------------------------------|----------------------------------|-----------------------------------------------------------------------------------------------------------------------------------------------------------------------------------------------------------------|-----------------------------------------------|-------------------------------------------------------|--------------------------------------------------------------------------------------|-------------------------------------------------------------------|------------------------------------------------------------|
| Development and validation of QRISK3 risk prediction algorithms to estimate future risk of cardiovascular disease: prospective cohort study | Hippisley-Cox et al                                            | <a href="https://doi.org/10.1136/bmj.2019.099999">10.1136/bmj.2019.099999</a>                             | 923       | BMJ                                                | 2017 | Risk of CVD                                          | Cox's proportional hazards models                          | United Kingdom                   | Self-reported in ~60% of all subjects. Majority (>85%) White or not recorded. ~2% Indian. ~1% Pakistani. ~1% Bangladeshi. ~1.3% Other Asian. ~1% Black Caribbean. ~2% Black African. ~0.8% Chinese. 2.5% Other. | Age, ethnic origin                            | Sex                                                   | Yes                                                                                  | Harrell's C-statistics                                            | No                                                         |
| Risk prediction of cardiovascular death based on the QTc interval: evaluating age and gender differences in a large primary care population | Nielsen et al                                                  | <a href="https://doi.org/10.1093/eurheartj/ehv081">10.1093/eurheartj/ehv081</a>                           | 123       | European Heart Journal                             | 2014 | Risk of CVD                                          | Cox regression models                                      | Denmark                          | Not included                                                                                                                                                                                                    | Age                                           | Sex                                                   | Yes                                                                                  | C-statistics, Brier scores                                        | No                                                         |
| Cardiovascular disease risk prediction equations in 400 000 primary care patients in New Zealand: a derivation and validation study         | Pylypchuk et al                                                | <a href="https://doi.org/10.1016/S0140-6736(18)30664-0">10.1016/S0140-6736(18)30664-0</a>                 | 224       | The Lancet                                         | 2018 | Risk of fatal or non-fatal CVD event                 | Cox proportional hazard model                              | New Zealand                      | Majority (>55%) European. ~13% Maori. ~13% Pacific. ~9% Indian. ~11% Chinese or other Asian.                                                                                                                    | Measures of deprivation, ethnicity, age       | Sex                                                   | Yes                                                                                  | R <sup>2</sup> , Harrell's C statistic, and Royston's D statistic | No                                                         |
| The ACC/AHA 2013 pooled cohort equations compared to a Korean Risk Prediction Model for atherosclerotic cardiovascular disease              | Jung et al                                                     | <a href="https://doi.org/10.1016/j.atherosclerosis.2015.07.033">10.1016/j.atherosclerosis.2015.07.033</a> | 111       | Atherosclerosis                                    | 2015 | Ten-year atherosclerotic cardiovascular disease risk | Cox proportional hazard models                             | South Korea                      | Korean                                                                                                                                                                                                          | Age                                           | Sex                                                   | Yes                                                                                  | C-statistic, Hosmer-Lemeshow                                      | No                                                         |
| SCORE2 risk prediction algorithms: new models to estimate 10-year risk of cardiovascular disease in Europe                                  | SCORE2 working group and ESC Cardiovascular risk collaboration | <a href="https://doi.org/10.1093/eurheartj/ehab309">10.1093/eurheartj/ehab309</a>                         | 397       | European Heart Journal                             | 2021 | Ten-year risk of fatal and non-fatal CVD             | Fine and Gray model stratified by cohort and fitted to sex | Europe and North America         | Not included                                                                                                                                                                                                    | Age                                           | Risk region, sex                                      | Yes                                                                                  | Harrell's C-Index                                                 | No                                                         |
| Risk prediction by genetic risk scores for coronary heart disease is independent of self-reported family history                            | Tada et al                                                     | <a href="https://doi.org/10.1093/eurheartj/ehv462">10.1093/eurheartj/ehv462</a>                           | 276       | European Heart Journal                             | 2016 | Time to first occurrence of CHD                      | Cox proportional hazards regression models                 | Sweden                           | Swedish ancestry (genetic)                                                                                                                                                                                      | Sex, age                                      | N/A                                                   | No                                                                                   | Wald tests                                                        | No                                                         |
| A Validated Model for Sudden Cardiac Death Risk Prediction in Pediatric Hypertrophic Cardiomyopathy                                         | Miron et al                                                    | <a href="https://doi.org/10.1161/CIRCULATIONAHA.120.047235">10.1161/CIRCULATIONAHA.120.047235</a>         | 121       | Circulation                                        | 2020 | Risk of sudden cardiac death                         | Cause-specific hazard regression model                     | Canada, United States, Australia | Not included                                                                                                                                                                                                    | Sex, age                                      | N/A                                                   | No                                                                                   | C-statistic, cross validation                                     | No                                                         |
| Multilocus Genetic Risk Scores for Coronary Heart Disease Prediction                                                                        | Ganna et al                                                    | <a href="https://doi.org/10.1161/ATVBAHA.113.301218">10.1161/ATVBAHA.113.301218</a>                       | 174       | Arteriosclerosis, Thrombosis, and Vascular Biology | 2013 | Risk of coronary heart disease                       | Cox proportional hazard model                              | Sweden                           | Not included                                                                                                                                                                                                    | Sex, age                                      | N/A                                                   | No                                                                                   | C-index                                                           | No                                                         |

| Title                                                                                                                                                                                                                                                              | Authors           | Link/DOI                                                                            | Citations | Journal                                            | Year | Outcome assessed                        | Type of model used                                           | Geographic region           | Racial demographics (self-reported unless otherwise noted)                                                                                                                                                                                                                | Sensitive features considered as risk factors | Sensitive features considered for stratified analysis | Were model calibration and discrimination assessed for different sensitive features? | Criteria for model evaluation | Do authors explicitly consider or report fairness metrics? |
|--------------------------------------------------------------------------------------------------------------------------------------------------------------------------------------------------------------------------------------------------------------------|-------------------|-------------------------------------------------------------------------------------|-----------|----------------------------------------------------|------|-----------------------------------------|--------------------------------------------------------------|-----------------------------|---------------------------------------------------------------------------------------------------------------------------------------------------------------------------------------------------------------------------------------------------------------------------|-----------------------------------------------|-------------------------------------------------------|--------------------------------------------------------------------------------------|-------------------------------|------------------------------------------------------------|
| Improving the accuracy of prediction of heart disease risk based on ensemble classification techniques                                                                                                                                                             | Latha and Jeeva   | <a href="https://doi.org/10.1016/j.imu.2019.100203">10.1016/j.imu.2019.100203</a>   | 435       | Informatics in Medicine Unlocked                   | 2019 | Risk of heart disease                   | Comparative analysis of various classification ML algorithms | United States               | Not included                                                                                                                                                                                                                                                              | Sex, age                                      | N/A                                                   | No                                                                                   | Ten-fold cross validation     | No                                                         |
| Comparison of machine learning algorithms for clinical event prediction (risk of coronary heart disease)                                                                                                                                                           | Beunza et al      | <a href="https://doi.org/10.1016/j.jbi.2019.103257">10.1016/j.jbi.2019.103257</a>   | 142       | Journal of Biomedical Informatics                  | 2019 | Coronary risk at ten years              | Machine learning classification algorithms                   | United States               | Not included                                                                                                                                                                                                                                                              | Sex, age                                      | N/A                                                   | No                                                                                   | AUC                           | No                                                         |
| An improved ensemble learning approach for the prediction of heart disease risk                                                                                                                                                                                    | Mienye et al      | <a href="https://doi.org/10.1016/j.imu.2020.100402">10.1016/j.imu.2020.100402</a>   | 136       | Informatics in Medicine Unlocked                   | 2020 | Risk of CVD event                       | Ensemble learning                                            | United States               | Not included                                                                                                                                                                                                                                                              | Sex, age                                      | N/A                                                   | No                                                                                   | ROC                           | No                                                         |
| Validation of the 2014 European Society of Cardiology Guidelines Risk Prediction Model for the Primary Prevention of Sudden Cardiac Death in Hypertrophic Cardiomyopathy                                                                                           | Vriesendorp et al | <a href="https://doi.org/10.1161/CIRCEP.114.002553">10.1161/CIRCEP.114.002553</a>   | 143       | Circulation: Arrhythmia and Electrophysiology      | 2015 | Five-year risk of sudden cardiac death  | Cox regression models                                        | Belgium and the Netherlands | Not included                                                                                                                                                                                                                                                              | Age                                           | N/A                                                   | No                                                                                   | ROC, C-statistics             | No                                                         |
| Endothelial Dysfunction, Increased Arterial Stiffness, and Cardiovascular Risk Prediction in Patients With Coronary Artery Disease: FMD-J (Flow-Mediated Dilation Japan) Study A                                                                                   | Maruhashi et al   | <a href="https://doi.org/10.1161/JAHA.118.008588">10.1161/JAHA.118.008588</a>       | 106       | Journal of the American Heart Association          | 2018 | Risk of recurrent cardiovascular events | Cox proportional hazard regression analysis                  | Japan                       | Japanese                                                                                                                                                                                                                                                                  | Sex, age                                      | N/A                                                   | No                                                                                   | Schoenfeld residuals          | No                                                         |
| Electrical risk score beyond the left ventricular ejection fraction: prediction of sudden cardiac death in the Oregon Sudden Unexpected Death Study and the Atherosclerosis Risk in Communities Study                                                              | Aro et al         | <a href="https://doi.org/10.1093/eurheartj/ehx331">10.1093/eurheartj/ehx331</a>     | 115       | European Heart Journal                             | 2017 | Sudden cardiac arrest                   | Multivariable logistic regression analysis                   | United States               | In cases: 82% white, 11% Black, 1.9% Hispanic, 5.2% other. In controls: 92% white, 3.5% Black, 1.4% Hispanic, 3.3% other.                                                                                                                                                 | Sex, age                                      | N/A                                                   | No                                                                                   | Hosmer-Lemeshow, C-statistic  | No                                                         |
| Genetic Risk Prediction and a 2-Stage Risk Screening Strategy for Coronary Heart Disease                                                                                                                                                                           | Tikkanen et al    | <a href="https://doi.org/10.1161/ATVBAHA.112.301120">10.1161/ATVBAHA.112.301120</a> | 206       | Arteriosclerosis, Thrombosis, and Vascular Biology | 2013 | Fatal and non-fatal CHD risk            | Cox regression models                                        | Finland                     | Finnish ancestry (genetic)                                                                                                                                                                                                                                                | Sex, age                                      | N/A                                                   | No                                                                                   | C-index                       | No                                                         |
| 10-Year Coronary Heart Disease Risk Prediction Using Coronary Artery Calcium and Traditional Risk Factors: Derivation in the MESA (Multi-Ethnic Study of Atherosclerosis) With Validation in the HNR (Heinz Nixdorf Recall) Study and the DHS (Dallas Heart Study) | McClelland et al  | <a href="https://doi.org/10.1016/j.jacc.2015.08.035">10.1016/j.jacc.2015.08.035</a> | 561       | Journal of the American College of Cardiology      | 2015 | Incident CHD events                     | Penalized Cox proportional hazards model                     | United States               | A combination of several datasets. One was entirely (100%) Caucasian. The largest was 38.5% Caucasian, 11.8% Chinese American, 27.8% African American, 22% Hispanic American. The other was 37.9% Caucasian, 49.1% African American, 11.3% Hispanic American, 1.8% Other. | Age, sex, BMI, race/ethnicity                 | N/A                                                   | Yes                                                                                  | C-statistic and ROC           | No                                                         |

| Title                                                                                                     | Authors    | Link/DOI                                                                                          | Citations | Journal                                       | Year | Outcome assessed             | Type of model used              | Geographic region | Racial demographics (self-reported unless otherwise noted) | Sensitive features considered as risk factors | Sensitive features considered for stratified analysis | Were model calibration and discrimination assessed for different sensitive features? | Criteria for model evaluation      | Do authors explicitly consider or report fairness metrics? |
|-----------------------------------------------------------------------------------------------------------|------------|---------------------------------------------------------------------------------------------------|-----------|-----------------------------------------------|------|------------------------------|---------------------------------|-------------------|------------------------------------------------------------|-----------------------------------------------|-------------------------------------------------------|--------------------------------------------------------------------------------------|------------------------------------|------------------------------------------------------------|
| Global Electric Heterogeneity Risk Score for Prediction of Sudden Cardiac Death in the General Population | Waks et al | <a href="https://doi.org/10.1161/CIRCULATIONAHA.116.021306">10.1161/CIRCULATIONAHA.116.021306</a> | 131       | Circulation: Arrhythmia and Electrophysiology | 2016 | Risk of sudden cardiac death | Cox proportional hazards models | United States     | 77.3% white; 22.7% Black (other races excluded)            | Sex, race, age                                | N/A                                                   | No                                                                                   | Schoenfeld residuals, C-statistics | No                                                         |

## S.2 Table of Selected CVD Papers for Subpopulation

| Title                                                                                                                                                                    | Authors             | Link/DOI                                                                                          | Citations | Journal                                     | Year | Outcome assessed                                 | Type of model used                                                                                                            | Geographic region                                | Racial demographics (self-reported unless otherwise noted)                                                                    | Sensitive features considered as risk factors                  | Sensitive features considered for stratified analysis | Were model calibration and discrimination assessed for different sensitive features? | Criteria for model evaluation                 | Do authors explicitly consider or report fairness metrics? |
|--------------------------------------------------------------------------------------------------------------------------------------------------------------------------|---------------------|---------------------------------------------------------------------------------------------------|-----------|---------------------------------------------|------|--------------------------------------------------|-------------------------------------------------------------------------------------------------------------------------------|--------------------------------------------------|-------------------------------------------------------------------------------------------------------------------------------|----------------------------------------------------------------|-------------------------------------------------------|--------------------------------------------------------------------------------------|-----------------------------------------------|------------------------------------------------------------|
| Predicting the 10-Year Risks of Atherosclerotic Cardiovascular Disease in Chinese Population                                                                             | Yang et al          | <a href="https://doi.org/10.1161/CIRCULATIONAHA.116.022367">10.1161/CIRCULATIONAHA.116.022367</a> | 402       | Circulation                                 | 2016 | Ten year risk of fatal and non-fatal CVD         | Cox proportional hazards models                                                                                               | China                                            | Chinese                                                                                                                       | Age, geographic region (Northern/Southern China), urbanization | Sex                                                   | Yes                                                                                  | C-statistics and modified Nam-D'Agostino test | No                                                         |
| Cardiovascular Disease Risk Prediction in the HIV Outpatient Study                                                                                                       | Thompson-Paul et al | <a href="https://doi.org/10.1093/cid/ciw615">10.1093/cid/ciw615</a>                               | 146       | Clinical Infectious Diseases                | 2016 | Risk of CVD event                                | Adaptations of Framingham, PCEs, SCORE and DAD                                                                                | United States                                    | Majority (>50%) White, non-Hispanic. ~30% Black, non-Hispanic. ~12% Hispanic. ~3% Other.                                      | Sex, age                                                       | N/A                                                   | No                                                                                   | C-statistic and Hosmer-Lemeshow               | No                                                         |
| An updated prediction model of the global risk of cardiovascular disease in HIV-positive persons: The Data-collection on Adverse Effects of Anti HIV Drugs (D:A:D) study | Friis-Møller et al  | <a href="https://doi.org/10.1177/2047487315579291">10.1177/2047487315579291</a>                   | 228       | European Journal of Preventative Cardiology | 2020 | Risk of CVD event                                | Cox regression models                                                                                                         | Europe and Australia                             | Majority (>60%) White. ~7% Non-White. 32% Unknown.                                                                            | Age, sex, ethnicity                                            | N/A                                                   | No                                                                                   | C-statistic and Hosmer-Lemeshow               | No                                                         |
| Development of a Novel Risk Prediction Model for Sudden Cardiac Death in Childhood Hypertrophic Cardiomyopathy (HCM Risk-Kids)                                           | Norrish et al       | <a href="https://doi.org/10.1001/jamacardio.2019.2861">10.1001/jamacardio.2019.2861</a>           | 135       | JAMA Cardiology                             | 2019 | Risk of sudden cardiac death or equivalent event | Cox proportional hazards regression models                                                                                    | Western Europe, Eastern Europe, Japan, Australia | Not included                                                                                                                  | None                                                           | N/A                                                   | No                                                                                   | Schoenfeld residuals, C-index                 | No                                                         |
| Anthropometric measurements of general and central obesity and the prediction of cardiovascular disease risk in women: a cross-sectional study                           | Goh et al           | <a href="https://doi.org/10.1136/bmjopen-2013-004138">10.1136/bmjopen-2013-004138</a>             | 204       | BMJ Open                                    | 2014 | Ten-year CVD risk                                | Framingham risk score model, SCORE risk chart for high-risk regions, general CVD and simplified general CVD risk score models | Australia                                        | Reported as ethnicity: Australia (76.5%); UK and Ireland (9.5%); Northern Europe (4.1%); Southern Europe (5.4%); Asia (4.5%). | Obesity, ethnicity                                             | N/A                                                   | No                                                                                   | ROC                                           | No                                                         |
| Prediction of First Cardiovascular Disease Event in Type 1 Diabetes Mellitus                                                                                             | Vitisen et al       | <a href="https://doi.org/10.1161/CIRCULATIONAHA.115.018844">10.1161/CIRCULATIONAHA.115.018844</a> | 104       | Circulation                                 | 2016 | Fatal and non-fatal CVD risk                     | Poisson regression analysis                                                                                                   | Denmark                                          | White (>90% Danish ancestry)                                                                                                  | Sex, age                                                       | N/A                                                   | No                                                                                   | Hosmer-Lemeshow                               | No                                                         |

### S.3 Table of Selected COVID-19 Papers for General Population

| Title                                                                                                                                                                  | Authors                  | Link/DOI                                                                                  | Citations | Journal                                      | Year | Outcome assessed                                              | Type of model used                                             | Geographic region        | Racial demographics (self-reported unless otherwise noted)                                                                      | Sensitive features considered as risk factors                            | Sensitive features considered for stratified analysis | Were model calibration and discrimination assessed for different sensitive features? | Criteria for model evaluation                           | Do authors explicitly consider or report fairness metrics? |
|------------------------------------------------------------------------------------------------------------------------------------------------------------------------|--------------------------|-------------------------------------------------------------------------------------------|-----------|----------------------------------------------|------|---------------------------------------------------------------|----------------------------------------------------------------|--------------------------|---------------------------------------------------------------------------------------------------------------------------------|--------------------------------------------------------------------------|-------------------------------------------------------|--------------------------------------------------------------------------------------|---------------------------------------------------------|------------------------------------------------------------|
| Predicting mortality risk in patients with COVID-19 using machine learning to help medical decision-making                                                             | Pourhomayoun and Shakibi | <a href="https://doi.org/10.1016/j.smhl.2020.100178">10.1016/j.smhl.2020.100178</a>       | 246       | Smart Health                                 | 2021 | Risk of mortality                                             | Multiple ML methods                                            | 146 countries            | Not included                                                                                                                    | Age, sex, country, province, city, pre-existing health conditions        | N/A                                                   | No                                                                                   | Accuracy, sensitivity, specificity, AUC                 | No                                                         |
| Clinical, radiological, and laboratory characteristics and risk factors for severity and mortality of 289 hospitalized COVID-19 patients                               | Zhang et al.             | <a href="https://doi.org/10.1111/all.14496">10.1111/all.14496</a>                         | 204       | Allergy                                      | 2021 | Risk of in-hospital mortality                                 | Logistic regression                                            | China                    | Not included                                                                                                                    | Age, sex, comorbidity, smoking, surgery history, biological measurements | N/A                                                   | No                                                                                   | AUC                                                     | No                                                         |
| Clinical and inflammatory features based machine learning model for fatal risk prediction of hospitalized COVID-19 patients: results from a retrospective cohort study | Guan et al.              | <a href="https://doi.org/10.1080/07853890.2020.1868564">10.1080/07853890.2020.1868564</a> | 109       | Annals of Medicine                           | 2021 | Risk of mortality                                             | XGBoost                                                        | China                    | Not included                                                                                                                    | Disease severity, age, biological measurements                           | N/A                                                   | No                                                                                   | AUC, prediction accuracy, precision, and F1 scores      | No                                                         |
| Risk factors for COVID-19 progression and mortality in hospitalized patients without pre-existing comorbidities                                                        | Liu et al.               | <a href="https://doi.org/10.1016/j.jiph.2021.11.012">10.1016/j.jiph.2021.11.012</a>       | 26        | Journal of Infection and Public Health       | 2022 | Risk of mortality                                             | Logistic regression                                            | China                    | Not included                                                                                                                    | Sex, age, biological measurements                                        | N/A                                                   | No                                                                                   | Not specified                                           | No                                                         |
| Machine learning approaches in Covid-19 severity risk prediction in Morocco                                                                                            | Laatifi et al.           | <a href="https://doi.org/10.1186/s40537-021-00557-0">10.1186/s40537-021-00557-0</a>       | 27        | Journal of Big Data                          | 2022 | Risk of severity                                              | UMAP, logistic regression, SVM, KNN, GaussianNB, decision tree | Morocco                  | Not included                                                                                                                    | Sex, age, comorbidities, biological measurements                         | N/A                                                   | No                                                                                   | Accuracy, sensitivity, specificity, AUC                 | No                                                         |
| External validation of the QCovid risk prediction algorithm for risk of COVID-19 hospitalisation and mortality in adults: national validation cohort study in Scotland | Simpson et al.           | <a href="https://doi.org/10.1136/thoraxjnl-2021-217580">10.1136/thoraxjnl-2021-217580</a> | 17        | Thorax                                       | 2022 | Risk of hospitalization, risk of death                        | QCovid algorithm (Fine-Gray sub-distribution hazard model)     | Scotland, United Kingdom | Not included                                                                                                                    | Socioeconomic status and pre-existing health conditions                  | Sex, age, admission period                            | No                                                                                   | Harrell's C, R <sup>2</sup> , D-statistics, Brier Score | No                                                         |
| Predicting the evolution of COVID-19 mortality risk: A recurrent neural network approach                                                                               | Villegas et al.          | <a href="https://doi.org/10.1016/j.cmpb.2022.100089">10.1016/j.cmpb.2022.100089</a>       | 13        | Computer Methods and Programs in Biomedicine | 2023 | Risk of mortality                                             | RNN                                                            | Spain                    | Not included                                                                                                                    | Sex, age, medication, hospital stay, biological measurement              | N/A                                                   | No                                                                                   | Accuracy, sensitivity, specificity, AUC                 | No                                                         |
| 19-Related Hospitalization, Intensive Care Unit Admission, Invasive Mechanical Ventilation, and Death — United States, March–December 2020                             | Kompaniyets et al.       | <a href="https://doi.org/10.15585/mmwr.mm7010e4">10.15585/mmwr.mm7010e4</a>               | 394       | Morbidity and Mortality Weekly Report        | 2021 | Risk of hospitalization, risk of ICU admission, risk of death | Multivariable logit model                                      | United States            | Hispanic (10.4%), White non-Hispanic (63.7%), Black non-Hispanic (18.4%), Asian non-Hispanic (2.1%), Other (4%), Unknown (1.4%) | Sex, race, hospital region, insurance payer type                         | Age, BMI                                              | No                                                                                   | Sensitivity analysis                                    | No                                                         |

| Title                                                                                                                                                        | Authors          | Link/DOI                                                                                | Citations | Journal                              | Year | Outcome assessed                                                                      | Type of model used                                                              | Geographic region | Racial demographics (self-reported unless otherwise noted)                                                                                          | Sensitive features considered as risk factors                                             | Sensitive features considered for stratified analysis | Were model calibration and discrimination assessed for different sensitive features? | Criteria for model evaluation             | Do authors explicitly consider or report fairness metrics? |
|--------------------------------------------------------------------------------------------------------------------------------------------------------------|------------------|-----------------------------------------------------------------------------------------|-----------|--------------------------------------|------|---------------------------------------------------------------------------------------|---------------------------------------------------------------------------------|-------------------|-----------------------------------------------------------------------------------------------------------------------------------------------------|-------------------------------------------------------------------------------------------|-------------------------------------------------------|--------------------------------------------------------------------------------------|-------------------------------------------|------------------------------------------------------------|
| Risk factors for mortality in patients with COVID-19 in New York City                                                                                        | Mikami et al.    | <a href="https://doi.org/10.1007/s11606-020-05983-z">10.1007/s11606-020-05983-z</a>     | 286       | Journal of General Internal Medicine | 2021 | Risk of in-hospital mortality                                                         | Generalized additive models and Cox proportional hazard regression model        | United States     | White (26.9%), Black(24.1%), Asian (4.4%), Others (44.7%), Hispanic (25.4%), Non-Hispanic (57.5%), Unknown ethnicity (17%)                          | Age, sex, race, smoking, ethnicity, biological measurements, comorbidities                | N/A                                                   | No                                                                                   | AUC                                       | No                                                         |
| Federated learning of electronic healthrecords to improve mortality prediction in hospitalized patients with COVID-19: machine learning approach             | Vaid et al.      | <a href="https://doi.org/10.2196/24207">10.2196/24207</a>                               | 100       | JMIR Medical Informatics             | 2021 | Risk of mortality                                                                     | Multilayer perceptron (MLP) model, logistic regression, federate learning model | United States     | Hispanic (26.07%), non-Hispanic (59.45%), Unknown ethnicity (14.48%); White (23.9%), Black (28.54%), Asian (4.84%), Other (38.57%), Unknown (4.14%) | Sex, race, ethnicity, past medical history                                                | N/A                                                   | No                                                                                   | AUC                                       | No                                                         |
| Estimating risk of mechanical ventilation and in-hospital mortality among adult COVID-19 patients admitted to Mass General Brigham: The VICE and DICE scores | Nicholson et al. | <a href="https://doi.org/10.1016/j.eclinm.2021.100765">10.1016/j.eclinm.2021.100765</a> | 83        | Eclinical Medicine                   | 2021 | Ventilation in COVID Estimator [VICE] score and Death in COVID Estimator [DICE] score | Logistic regression                                                             | United States     | White (42%), Black (17.9%), Hispanic (10.8%), Asian (3.6%), Other/mix (17%),Not recorded (8.6%)                                                     | Weight, age, sex, BMI, comorbidities, race, biological measurements, and medication taken | N/A                                                   | No                                                                                   | AUC and C-statistics                      | No                                                         |
| Machine-learning-based COVID-19 mortality prediction model and identification of patients at low and high risk of dying                                      | Banoei et al.    | <a href="https://doi.org/10.1186/s13054-021-03749-5">10.1186/s13054-021-03749-5</a>     | 63        | Critical Care                        | 2021 | Mortality outcome and clustering of high mortality risk patients                      | Statistically inspired modification of partial least square (SIMPLS) analysis   | United States     | European American (36.75%), African American (15.25%), Asian (1%), More than one race (5%), Hispanic (59.75%), non-Hispanic (40.25%)                | Age, sex, race, smoking, alcohol, level of consciousness, mental status                   | N/A                                                   | No                                                                                   | Q <sup>2</sup> , R <sup>2</sup> , and AUC | No                                                         |

#### S.4 Table of Selected COVID-19 Papers for Subpopulation

| Title                                                                                                                                                          | Authors             | Link/DOI                                                                                  | Citations | Journal                                | Year | Outcome assessed                                | Type of model used                          | Geographic region | Racial demographics (self-reported unless otherwise noted)                 | Sensitive features considered as risk factors                                                                | Sensitive features considered for stratified analysis | Were model calibration and discrimination assessed for different sensitive features? | Criteria for model evaluation | Do authors explicitly consider or report fairness metrics? |
|----------------------------------------------------------------------------------------------------------------------------------------------------------------|---------------------|-------------------------------------------------------------------------------------------|-----------|----------------------------------------|------|-------------------------------------------------|---------------------------------------------|-------------------|----------------------------------------------------------------------------|--------------------------------------------------------------------------------------------------------------|-------------------------------------------------------|--------------------------------------------------------------------------------------|-------------------------------|------------------------------------------------------------|
| Clinical characteristics and risk factors for death among hospitalised children and adolescents with COVID-19 in Brazil: an analysis of a nationwide database  | Oliveira et al.     | <a href="https://doi.org/10.1016/S2352-4642(21)00134-6">10.1016/S2352-4642(21)00134-6</a> | 112       | The Lancet Child and Adolescent Health | 2021 | Time to recovery or time to death               | Proportional sub-distribution hazards model | Brazil            | White (35.24%), Black or Brown (62.42%), Asian (0.88%), Indigenous (1.44%) | Date of admission, date of onset, age, sex, ethnicity, geopolitical macroregion, number of health conditions | N/A                                                   | No                                                                                   | Competing risks analysis      | No                                                         |
| Association between antidepressant use and reduced risk of intubation or death in hospitalized patients with COVID-19: results from an observational study     | Hoertel et al.      | <a href="https://doi.org/10.1038/s41380-021-01021-4">10.1038/s41380-021-01021-4</a>       | 208       | Molecular Psychiatry                   | 2021 | Time from study baseline to intubation or death | Cox regression proportional hazard models   | France            | Not included                                                               | Sex, age, hospital, obesity, smoking status, medical condition, and biological markers of disease severity   | Antidepressant type                                   | No                                                                                   | Sensitivity analysis          | No                                                         |
| Hypertension, diabetes and obesity, major risk factors for death in patients with COVID-19 in Mexico                                                           | Peña et al.         | <a href="https://doi.org/10.1016/j.arcmed.2020.12.002">10.1016/j.arcmed.2020.12.002</a>   | 138       | Archives of Medical Research           | 2021 | Risk of mortality                               | Logistic regression                         | Mexico            | Not included                                                               | Age, sex, residence, smoking status, pneumonia, treat at home or hospital, and other chronic conditions      | N/A                                                   | No                                                                                   | Not specified                 | No                                                         |
| Clinical characteristics and risk factors for mortality in very old patients hospitalized with COVID-19 in Spain                                               | Ramos-Rincon et al. | <a href="https://doi.org/10.1093/geron/glaa243">10.1093/geron/glaa243</a>                 | 123       | The Journals of Gerontology: Series A  | 2021 | Risk of in-hospital mortality                   | Logistic regression                         | Spain             | Not included                                                               | Age, sex, comorbidities, dependence state, symptoms, biological measurements                                 | N/A                                                   | No                                                                                   | Hosmer-Lemeshow test          | No                                                         |
| Risk of infection, hospitalisation, and death up to 9 months after a second dose of COVID-19 vaccine: a retrospective, total population cohort study in Sweden | Nordström et al.    | <a href="https://doi.org/10.1016/S0140-6736(22)00089-7">10.1016/S0140-6736(22)00089-7</a> | 209       | The Lancet                             | 2022 | Risk of infection, risk of severe COVID         | Cox regression proportional hazard models   | Sweden            | Not included                                                               | Age, sex, homemaker service, comorbidities, born in Sweden or not                                            | N/A                                                   | No                                                                                   | Schoenfeld residuals          | No                                                         |

| Title                                                                                                                                                           | Authors              | Link/DOI                                                                                  | Citations | Journal                             | Year | Outcome assessed                                           | Type of model used                                                                                                                          | Geographic region                | Racial demographics (self-reported unless otherwise noted)                                                                                                         | Sensitive features considered as risk factors                          | Sensitive features considered for stratified analysis   | Were model calibration and discrimination assessed for different sensitive features? | Criteria for model evaluation              | Do authors explicitly consider or report fairness metrics? |
|-----------------------------------------------------------------------------------------------------------------------------------------------------------------|----------------------|-------------------------------------------------------------------------------------------|-----------|-------------------------------------|------|------------------------------------------------------------|---------------------------------------------------------------------------------------------------------------------------------------------|----------------------------------|--------------------------------------------------------------------------------------------------------------------------------------------------------------------|------------------------------------------------------------------------|---------------------------------------------------------|--------------------------------------------------------------------------------------|--------------------------------------------|------------------------------------------------------------|
| Risk prediction of covid-19 related death and hospital admission in adults after covid-19 vaccination: national prospective cohort study                        | Hippisley-Cox et al. | <a href="https://doi.org/10.1136/bmj.n2244">10.1136/bmj.n2244</a>                         | 262       | BMJ                                 | 2021 | Time to COVID-19 related death and time to hospitalization | Cause-specific Cox proportional hazard models                                                                                               | United Kingdom                   | White (68.77%), Indian (2.91%), Pakistani (1.61%), Bangladeshi (1.17%), Other Asian (1.68%), Caribbean (0.7%), Black African (1.63%), Chinese (0.6%), Other (2.7%) | Age, sex, ethnic origin, comorbidities, and dose of vaccination        | N/A                                                     | No                                                                                   | C-statistics, Rsq, D statistics            | No                                                         |
| Comparison of mortality risk in patients with cirrhosis and COVID-19 compared with patients with cirrhosis alone and COVID-19 alone: multicentre matched cohort | Bajaj et al.         | <a href="https://doi.org/10.1136/gut.2020.322118">10.1136/gut.2020-322118</a>             | 207       | Gut                                 | 2021 | Risk of mortality                                          | Logistic regression                                                                                                                         | United States                    | White (56.25%), Non-white (43.75%), Hispanic ethnicity (7.35%), non-Hispanic ethnicity (92.65%)                                                                    | Sex, age, race and ethnicity, smoking status, comorbid conditions      | N/A                                                     | No                                                                                   | Not specified                              | No                                                         |
| Metformin and risk of mortality in patients hospitalised with COVID-19: a retrospective cohort analysis                                                         | Bramante et al.      | <a href="https://doi.org/10.1016/S2666-7568(20)30033-7">10.1016/S2666-7568(20)30033-7</a> | 156       | The Lancet Healthy Longevity        | 2021 | Risk of in-hospital mortality                              | Logistic regression, mixed-effect logistic regression, Cox proportional hazard models, propensity-matched mixed-effects logistic regression | United States                    | Not included                                                                                                                                                       | Sex, age, pre-existing health condition, other medication use, and BMI | Metformin use and sex                                   | No                                                                                   | Schoenfeld residuals, sensitivity analysis | No                                                         |
| Maternal vaccination and risk of hospitalization for Covid-19 among infants                                                                                     | Halasa et al.        | <a href="https://doi.org/10.1056/NEJMoA2204399">10.1056/NEJMoA2204399</a>                 | 112       | The New England Journal of Medicine | 2022 | Risk of hospitalization                                    | Logistic regression                                                                                                                         | United States                    | White non-Hispanic (39.18%), Black non-Hispanic (17.54%), Hispanic any-race (28.79%), Other non-Hispanic (6.39%), Unknown (8.1%)                                   | Age, sex, race and ethnicity, region                                   | Type of vaccine, time of vaccine, and date of admission | No                                                                                   | Not specified                              | No                                                         |
| Diet quality and risk and severity of COVID-19: a prospective cohort study                                                                                      | Merino et al.        | <a href="https://doi.org/10.1136/gut.2021.325353">10.1136/gut.2021-325353</a>             | 144       | Gut                                 | 2021 | Risk of infection, risk of severe COVID                    | Cox regression proportional hazard models                                                                                                   | United States and United Kingdom | White (96%), Black (0.7%), Asian (1.8%), Other (1.2%), Missing (0.3%)                                                                                              | health condition, zip code, social economic status, smoking, physical  | Socio-economic status, dietary preference               | No                                                                                   | Schoenfeld residuals                       | No                                                         |
